# Supplementary material for: Non-Targeted Metabolomics Approach Revealed Significant Changes in Metabolic Pathways in Patients with Chronic Traumatic Encephalopathy
Source: MDPI journal article supplement (doi:10.3390/biomedicines10071718), 2022-07-15
Supplement: s1 [file s1]

## **Supplementary Information**

# **Non-targeted Metabolomics Approach Revealed Significant Changes in Metabolic Pathways in Patients with Chronic Traumatic Encephalopathy**

Jinkyung Lee, SuHyun Kim, Yoon Hwan Kim, Uiyeol Park, Junghee Lee, Ann C. McKee, Ky  
oung Heon Kim, Hoon Ryu, and Jeongae Lee

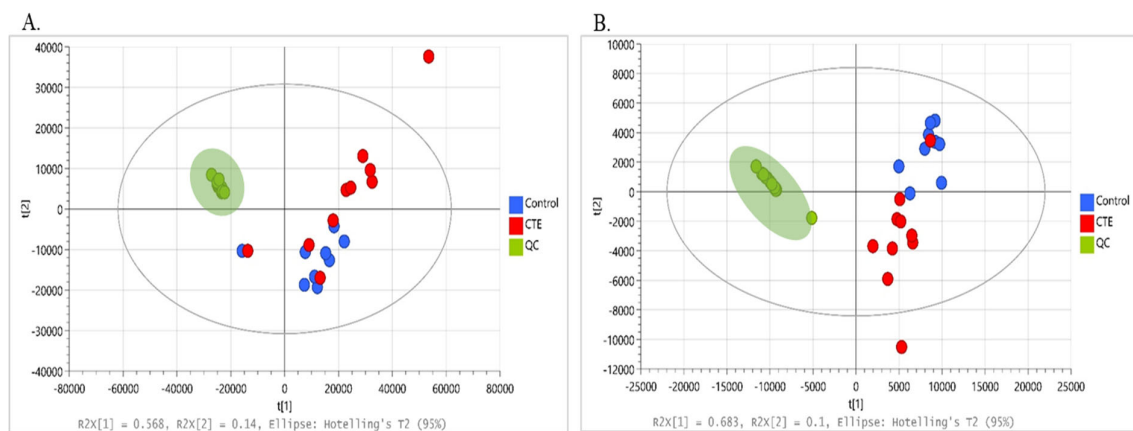

**Figure S1. Principal component analysis (PCA) score plot of quality control (QC) samples.** (A) In positive ion mode. (B) In negative ion mode. Clustering of QC samples (green) indicate that the raw data was acquired with a good repeatability.

A.

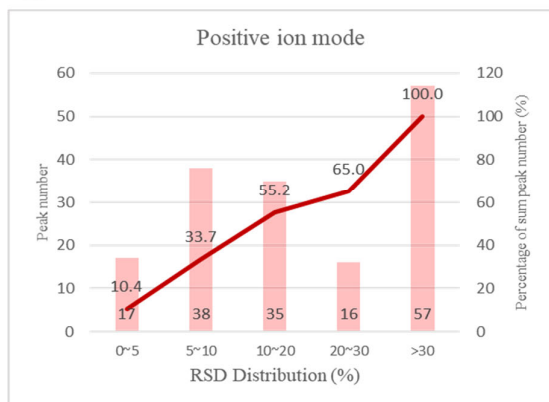

B.

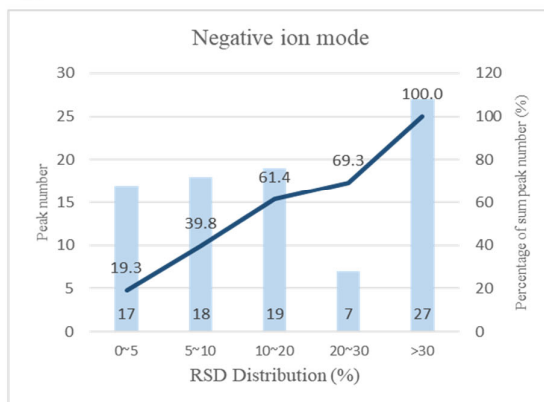

**Figure S2. The relative standard deviation (RSD) of peaks in QC samples. (A) In positive ion mode. (B) In negative ion mode.**

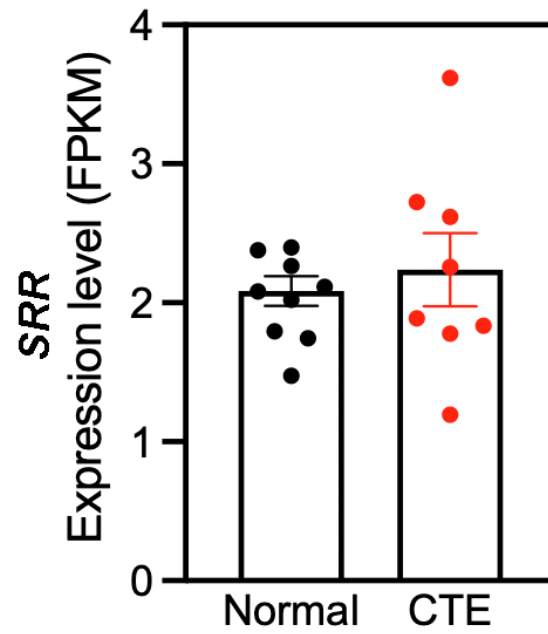

**Figure S3. *Serine racemase (SRR)* gene expression is slightly increased in CTE patients ( $N = 8$ ) compared to normal subjects ( $N = 8$ ).  $P$  value is 0.136**

**Table S1. Information on the postmortem brain tissues (superior temporal cortex) from control subjects and CTE patients.** CTE stages [from stages I (mild) to IV (severe)] were determined according to Dr. McKee criteria based on the density and regional deposition of hyperphosphorylated tau (p-tau) pathology. The criteria for pathological diagnosis of CTE were adopted and refined by the National Institute of Neurological Disorders and Stroke (NINDS)/National Institute of Biomedical Imaging and Bioengineering (NIBIB).

| Number | Case    | Sex    | Age | CTE Stage |
|--------|---------|--------|-----|-----------|
| 1      | Control | Female | 101 | N/A       |
| 2      | Control | Female | 87  | N/A       |
| 3      | Control | Male   | 74  | N/A       |
| 4      | Control | Male   | 86  | N/A       |
| 5      | Control | Female | 87  | N/A       |
| 6      | Control | Male   | 89  | N/A       |
| 7      | Control | Male   | 67  | N/A       |
| 8      | Control | Male   | 82  | N/A       |
| 9      | Control | Male   | 61  | N/A       |
|        |         |        |     |           |
| 1      | CTE     | Male   | 82  | IV        |
| 2      | CTE     | Male   | 66  | IV        |
| 3      | CTE     | Male   | 58  | III       |
| 4      | CTE     | Male   | 79  | IV        |
| 5      | CTE     | Male   | 52  | III       |
| 6      | CTE     | Male   | 69  | III       |
| 7      | CTE     | Male   | 70  | IV        |
| 8      | CTE     | Male   | 82  | IV        |
| 9      | CTE     | Male   | 66  | IV        |
| 10     | CTE     | Male   | 53  | III       |

**Table S2. Reversed-phase LTQ-Orbitrap-MS gradient elution program for ESI+ and ESI− modes.**

| Time (min) | Mobile phase A (%) | Mobile phase B (%) |
|------------|--------------------|--------------------|
| 0          | 100                | 0                  |
| 3          | 100                | 0                  |
| 10         | 50                 | 50                 |
| 12         | 10                 | 90                 |
| 12.5       | 100                | 0                  |
| 14         | 100                | 0                  |

**Table S3. The detailed results of metabolic pathway analysis.**

| Pathway Name                                        | Total | Hits | Raw p  | $-\log(10)p$ | FDR    | Impact |
|-----------------------------------------------------|-------|------|--------|--------------|--------|--------|
| Tyrosine metabolism                                 | 42    | 4    | 0.0001 | 4.15         | 0.0014 | 0.2460 |
| Arginine and proline metabolism                     | 38    | 4    | 0.0017 | 2.76         | 0.0110 | 0.1169 |
| Glycine, serine and threonine metabolism            | 33    | 4    | 0.0104 | 1.98         | 0.0237 | 0.2267 |
| Aminoacyl-tRNA biosynthesis                         | 48    | 4    | 0.0127 | 1.90         | 0.0237 | 0.1667 |
| Phenylalanine, tyrosine and tryptophan biosynthesis | 4     | 2    | 0.0151 | 1.82         | 0.0237 | 1.0000 |
| Phenylalanine metabolism                            | 10    | 2    | 0.0151 | 1.82         | 0.0237 | 0.3571 |
| Nicotinate and nicotinamide metabolism              | 15    | 1    | 0.0162 | 1.79         | 0.0237 | 0.1943 |
| Retinol metabolism                                  | 17    | 1    | 0.0321 | 1.49         | 0.0359 | 0.2165 |
